# Supplementary material for: The quality of life in epidermolysis bullosa (EB-QoL) questionnaire: Translation, cultural adaptation, and validation into the Farsi language
Source: PubMed Central journal article supplement — Int J Womens Dermatol. 2020 Jun 3;6(4):301–5. doi: 10.1016/j.ijwd.2020.05.012 (PMC7522813; doi:10.1016/j.ijwd.2020.05.012), 2020-06-03
Supplement: mmc1.pdf [file mmc1.pdf]

پرسشنامه کیفیت زندگی در بیماران مبتلا به اپیدرمولیزیس بلوزا (QOLEB)

لطفا به این سوالات که درباره تاثیر بیماری ای بی بر روی زندگی شما است پاسخ دهید. لطفا از بین گزینه ها یک گزینه که بیشتر با موقعیت شما سازگار و همخوان می باشد را انتخاب نمایید. لطفا در انتها بنویسید چه مدت تکمیل این پرسشنامه طول کشید. سپاسگزارم

1- آیا به خاطر بیماری اپیدرمولیزیس بلوزا میزان حرکت شما در داخل منزل محدود شده است ؟

اصلا  کمی  زیاد  خیلی زیاد

2- آیا به خاطر بیماری اپیدرمولیزیس بلوزا حمام کردن برای شما دشوار است ؟

خیر

بله گاهی اوقات به کمک نیاز دارم

بله بیشتر اوقات به کمک نیاز دارم

بله من همیشه برای حمام کردن به کمک دیگران نیاز دارم

3- آیا بیماری اپیدرمولیزیس بلوزا باعث درد بدنی در شما می شود ؟

درد ندارم  گه گاهی (بطور متناوب) درد دارم

مکررا درد دارم  بطور دائم درد دارم

4 - بیماری اپیدرمولیزیس بلوزا چه تاثیری بر توانایی شما در نوشتن دارد ؟

مشکلی ایجاد نمی کند

دست گرفتن خودکار برای من مشکل است

برایم راحت تر است تایپ کنم تا اینکه بنویسم

من بخاطر بیماری اپیدرمولیزیس بولوزا قادر به نوشتن نیستم

5- آیا به خاطر بیماری اپیدرمولیزیس بولوزا غذا خوردن برای شما مشکل است؟

نه من بطور طبیعی غذا می‌خورم  کمی  زیاد

برای غذا خوردن، به لوله گاستروستومی وابسته هستم

6- آیا به خاطر بیماری اپیدرمولیزیس بولوزا، خرید کردن برای شما مشکل است؟

خیر، به هیچ وجه  کمی  خیلی  همیشه به کمک دیگران نیاز دارم

7- بیماری اپیدرمولیزیس بولوزا چه تاثیری بر روی شرکت شما در فعالیت های ورزشی دارد؟

اثری نداشته است

با احتیاط در هر ورزشی می‌توانم شرکت کنم

از برخی ورزشها و فعالیتها باید اجتناب کنم

من مجبورم از تمامی ورزشها حذر کنم

8- در زندگی چقدر بخاطر بیماری اپیدرمولیزیس بولوزا احساس ناامیدی و عجز می‌کنید؟

ناامید نیستم  کمی  خیلی

آنقدر احساس عجز می‌کنم که غالب اوقات خشمگین هستم

9- آیا مشکلات حرکتی ناشی از بیماری اپیدرمولیزیس بولوزا، باعث شده که از منزل کمتر بیرون بروید؟

خیر به هیچ‌وجه  کمی  زیاد  خیلی زیاد

10- آیا داشتن بیماری اپیدرمولیزیس بولوزا، روابط شما را با سایر اعضای خانواده تحت تاثیر قرار می‌دهد؟

هیچ تاثیری ندارد  تاثیر کمی دارد  تاثیر زیادی دارد  تاثیر بسیار زیادی دارد

11- چقدر برخورد دیگران باعث می‌شود که از داشتن این بیماری احساس شرمندگی کنید و خجالت بکشید؟

احساس شرمندگی نمی‌کنم  کمی  زیاد  خیلی زیاد

12- آیا شما تاکنون مجبور شده‌اید، یا نیاز هست بخاطر اینکه بیماری اپیدرمولیزیس بولوزا دارید، تغییراتی را در منزل خود ایجاد کنید؟ (برای مثال نصب سکوی شیب‌دار و غیره)

خیر اصلا  کمی  زیاد  خیلی زیاد

13- آیا داشتن بیماری اپیدرمولیزیس بولوزا روابط شما با دوستانتان را محدود کرده است؟

خیر به هیچ‌وجه  کمی  زیاد

به شدت تعاملات اجتماعی من را محدود کرده است

14- چقدر به خاطر داشتن بیماری اپیدرمولیزیس بولوزا نگران و مضطرب می باشید؟

هرگز مضطرب نمی‌شوم  کمی  زیاد  فوق العاده زیاد

15- تاثیر هزینه های بیماری اپیدرمولیزیس بولوزا بر وضعیت اقتصادی شما یا خانواده چگونه است؟

تأثیری ندارد  کمی تأثیر می‌گذارد

زیاد تأثیر می‌گذارد  خیلی زیاد تأثیر می‌گذارد

16- چقدر بخاطر بیماری اپیدرمولیزیس بولوزا احساس افسردگی می کنید؟

اصلا افسرده نیستم  کمی  خیلی  بطور مداوم افسرده ام

17- چقدر دیگران شما را به بخاطر داشتن بیماری اپیدرمولیزیس بولوزا، ناراحت و معذب می کنند(برای مثال با خیره شدن به شما یا مسخره کردن شما)؟

اصلا  کمی  خیلی  آنقدر زیاد که من وارد اجتماع نمی‌شوم

تکمیل این پرسشنامه چه مدت طول کشید؟.....دقیقه
